# Supplementary material for: Complement C5a Alters the Membrane Potential of Neutrophils during Hemorrhagic Shock
Source: Hindawi journal article supplement (doi:10.1155/2018/2052356), 2018-05-29
Supplement: f1 [file 2052356.f1.pdf]

# 1 Supplementary Materials description

- 2 Supplement 1: Equation 1-3 demonstrate the application of GHK equation to  
3 calculate the change of membrane potential of PMN after stimulation

Equation 1: simplified GHK equation to determine calculated membrane potential of PMN

$$\text{membrane potential [mV]} = -61 \log \frac{P_K [K]_i + P_{Na} [Na]_i}{P_K [K]_e + P_{Na} [Na]_e}$$

Equation 2: change in fluorescence per change in membrane potential resulting in slope of calibration curve

$$\frac{\Delta \text{ fluorescence [AU]}}{\Delta 1 \text{ mV membrane potential}} = \frac{\text{fluorescence (K15 - K4,5)}}{\text{membrane potential (K15 - K4,5)}}$$

Equation 3: Calculation of change in membrane potential after stimulation

$$\Delta \text{ membrane potential} = \frac{\text{fluorescence (stimulant - control)}}{\text{slope}}$$

4
